# Supplementary material for: The chromatin remodelling factor Chd7 protects auditory neurons and sensory hair cells from stress-induced degeneration
Source: PubMed Central journal article supplement (PMC8566505; doi:10.1038/s42003-021-02788-6), 2021-11-03
Supplement: 42003_2021_2788_MOESM2_ESM.pdf [file 42003_2021_2788_MOESM2_ESM.pdf]

## Description of Additional Supplementary Files

**File name:** Supplementary Data

**Description:**

*Supplementary Data 1:* FAC-sorted hair cell RNA sample, library data and RPKM values.

*Supplementary Data 2:* Summary of differential gene expression (hair cells).

*Supplementary Data 3:* FAC-sorted spiral ganglia neurons RNA sample, library data and RPKM values.

*Supplementary Data 4:* Summary of differential gene expression (neurons).

*Supplementary Data 5:* Hair cells: Disease Ontology.

*Supplementary Data 6:* Neurons: Disease Ontology.

*Supplementary Data 7:* Hair cells: Gene Ontology.

*Supplementary Data 8:* Neurons: Gene Ontology.

*Supplementary Data 9:* Chd7 ChIP-seq (neural progenitors).

*Supplementary Data 10:*

Source data for graphs and charts:

Figure 2c: Ribbon synapses.

Figure 3n: Hair cell phenotype.

Figure 3o: Neuronal phenotype.

Figure 4: ABR.

Figure 5c: qPCR.

Figure 7b: Oxidative stress-induced hair cell degeneration.
